# Supplementary material
Source: PubMed Central journal article supplement (PMC4053160)
Supplement: NIHMS192685-supplement-Suppl_Fig.pdf [file NIHMS192685-supplement-Suppl_Fig.pdf]

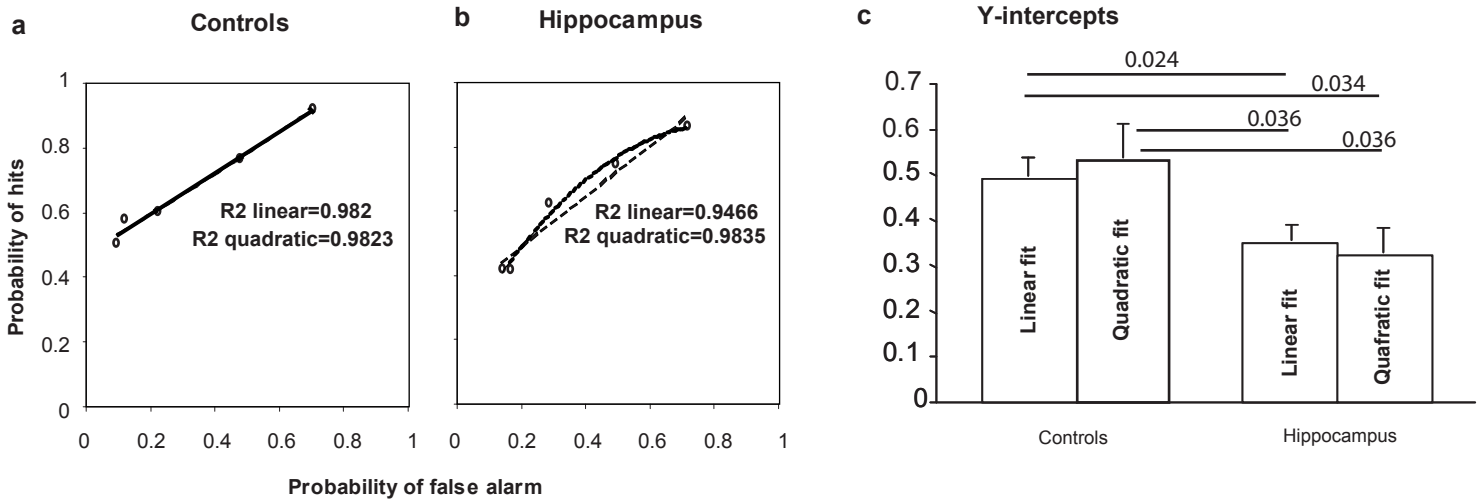

Supplementary figure. Regression fits. Linear (line) and quadratic (dash) regression lines are fitted to the data a. Control subjects' data are well fit by a linear regression and the fit is not improved by adding a quadratic component b. The regression on data from rats with hippocampal damage benefit by addition of a quadratic component. c. For all comparisons of linear and quadratic regressions, the Y-intercept (+ SEM) is higher in control subjects than for rats with hippocampal damage.
